# Supplementary material for: FLT3 and FLT3-ITD phosphorylate and inactivate the cyclin-dependent kinase inhibitor p27Kip1 in acute myeloid leukemia
Source: PubMed Central journal article supplement — Haematologica. 2017 May 18;102(8):1378–89. doi: 10.3324/haematol.2016.160101 (PMC5541872; doi:10.3324/haematol.2016.160101), 2017-08
Supplement: 2016_160101-Disclosures_and_Contributions.pdf [file 2016_160101-Disclosures_and_Contributions.pdf]

Haematologica  
HAEMATOL/2016/160101  
Version 3

FLT3 and FLT3-ITD phosphorylate and inactivate the cyclin dependent kinase inhibitor p27Kip1 in acute myeloid leukemia

Ines Peschel, Silvio R. Podmirseg, Martin Taschler, Justus Duyster, Katharina S. Götze, Heinz Sill, David Nachbaur, Heidelinde Jäkel, and Ludger Hengst

Disclosures: none

Contributions: I.P. performed most experiments, analysed data, prepared figures and wrote the draft; S.R.P. performed experiments, analysed data and prepared figures; M.T. performed experiments and analysed data; J.D. provided valuable reagents and intellectual input, K.S.G., H.S. and D.N. provided patient samples and clinical data. H.J. performed experiments, prepared figures, designed the study and wrote the manuscript. L.H. conceived and designed the study and wrote the manuscript.
